# Supplementary material
Source: PubMed Central journal article supplement (PMC5384470)
Supplement: NIHMS844823-supplement-Table_1.pdf [file NIHMS844823-supplement-Table_1.pdf]

**Supplementary Table 1. Estimated Caloric Intake and Dosage**

|                                  |                  | <i>Control</i>   | <i>Bisphenol A</i> |                   |                  |                                                |                  | <i>17<math>\alpha</math>-Ethinyl Estradiol</i> |                       |                                                |
|----------------------------------|------------------|------------------|--------------------|-------------------|------------------|------------------------------------------------|------------------|------------------------------------------------|-----------------------|------------------------------------------------|
|                                  |                  | <i>0.0 ppm</i>   | <i>0.03 ppm</i>    | <i>0.3 ppm</i>    | <i>3.0 ppm</i>   | <i>30 ppm</i>                                  | <i>300 ppm</i>   | <i>0.0001 ppm</i>                              | <i>0.001 ppm</i>      | <i>0.01 ppm</i>                                |
| <b>Caloric Intake (kcal/day)</b> | <i>Gestation</i> | 18.49 $\pm$ 5.01 | 17.57 $\pm$ 5.88   | 16.86 $\pm$ 3.96  | 18.54 $\pm$ 5.03 | 16.20 $\pm$ 5.19                               | 17.08 $\pm$ 4.29 | 19.03 $\pm$ 4.19                               | 18.80 $\pm$ 5.70      | <b>17.03 <math>\pm</math> 4.74<sup>a</sup></b> |
|                                  | <i>F1 F</i>      | 12.87 $\pm$ 1.30 | 12.44 $\pm$ 1.27   | 12.38 $\pm$ 1.33  | 12.63 $\pm$ 1.03 | 13.16 $\pm$ 0.95                               | 12.60 $\pm$ 1.27 | 13.63 $\pm$ 1.22                               | 13.46 $\pm$ 1.21      | 12.91 $\pm$ 1.12                               |
|                                  | <i>F1 M</i>      | 14.67 $\pm$ 1.42 | 14.04 $\pm$ 1.51   | 14.42 $\pm$ 1.41  | 15.07 $\pm$ 1.47 | <b>16.20 <math>\pm</math> 1.64<sup>a</sup></b> | 14.67 $\pm$ 1.46 | <b>15.79 <math>\pm</math> 1.99<sup>a</sup></b> | 14.46 $\pm$ 1.31      | 14.22 $\pm$ 0.99                               |
| <b>Est. Dose (mg/kg/day)</b>     | <i>Gestation</i> | 0.00             | 0.005 $\pm$ 0.002  | 0.051 $\pm$ 0.026 | 0.53 $\pm$ 0.20  | 5.62 $\pm$ 3.49                                | 48.3 $\pm$ 10.6  | 0.00002 $\pm$ 0.00001                          | 0.00023 $\pm$ 0.00019 | 0.0016 $\pm$ 0.00041                           |
|                                  | <i>F1 F</i>      | 0.00             | 0.005 $\pm$ 0.002  | 0.053 $\pm$ 0.024 | 0.56 $\pm$ 0.25  | 5.52 $\pm$ 2.67                                | 42.3 $\pm$ 10.5  | 0.00002 $\pm$ 0.00001                          | 0.00019 $\pm$ 0.00007 | 0.0018 $\pm$ 0.00067                           |
|                                  | <i>F1 M</i>      | 0.00             | 0.004 $\pm$ 0.002  | 0.044 $\pm$ 0.017 | 0.43 $\pm$ 0.14  | 4.49 $\pm$ 1.41                                | 40.0 $\pm$ 14.2  | 0.00002 $\pm$ 0.00001                          | 0.00013 $\pm$ 0.00005 | 0.0014 $\pm$ 0.00052                           |
| <b>Exp. Dose</b>                 |                  | 0.00             | 0.006              | 0.06              | 0.6              | 6                                              | 60               | 0.00002                                        | 0.0002                | 0.002                                          |

For each exposure group, values represent mean values  $\pm$  SD (n $\geq$ 14 litters; Range 14-20) based on estimates of consumption of chow per animal consuming chow with a caloric density 3.63 kcal/per g. <sup>a</sup> Significantly different from Control (p < 0.05). Est. Dose - Estimated Dose; Exp. Dose - Expected dose based on consumption of 15% of body weight (mg/kg/day).
